# Supplementary material for: A new strategy to express the extracellular α-amylase from Pyrococcus furiosus in Bacillus amyloliquefaciens
Source: PubMed Central journal article supplement (PMC4768087; doi:10.1038/srep22229), 2016-02-26

**A new strategy to express the extracellular  $\alpha$ -amylase from *Pyrococcus furiosus*  
in *Bacillus amyloliquefaciens***

Ping Wang<sup>§</sup>, Peili Wang<sup>§</sup>, Jian Tian, Xiaoxia Yu, Meihui Chang, Xiaoyu Chu,  
Ningfeng Wu\*

Biotechnology Research Institute, Chinese Academy of Agricultural Sciences, Beijing  
100081, China

\*Corresponding author: Ningfeng Wu, E-mail: wuningfeng@caas.cn, Tel.: +86 10  
82109844;

<sup>§</sup>These authors contributed equally to this work.

Supplementary Table S1. Primers

| Primer         | Sequence (5'–3')                          |
|----------------|-------------------------------------------|
| PamyA-F        | <u>TCTAGAG</u> ATCTCAAGCCCGCTTTTTT        |
| PamyA-R        | <u>CTCGAGG</u> CCATTTACGGCTGATGTTT        |
| pUBC19-CX-up   | GGTACAAGAAAAACGAGGAAAGATGC                |
| pUBC19-CX-down | TCGTATGTTGTGTGGAATTGTGAGC                 |
| SP-F           | ATGAGAGGGAGAGGAAACATGA                    |
| SP-R           | <u>CTCGAGG</u> GCTGATGTTTTTTGTAATCGGCAAAC |
| P43-F          | <u>TCTAGAT</u> GATAGGTGGTATGTTTTTCG       |
| P43-R          | TCCTCTCCCTCTCATGTGTACATTCCTCTCTTACC       |
| P16-F          | <u>TCTAGAC</u> CGATAATTCCAATTTTCAT        |
| P16-R          | <u>CTCGAG</u> TCCTCCACCTCCCATATCTC        |
| HN-F           | <u>GTCGACA</u> AACTTGAGGCGATCACATC        |
| HN-R           | <u>GAATTC</u> TTTCAATTCTCCGGGGAATC        |
| Cm-F           | <u>GAATTC</u> CTAGGAGCTGGCGTAATAGCGAAG    |
| Cm-R           | <u>GAGCTC</u> CTGCAGGTGAGCGAGGAAGCGGAAGA  |
| HC-F           | <u>GAGCTC</u> GGTAATAAAAAAACACCTCCAAGCTG  |
| HC-R           | <u>GGTACC</u> ATAAGAGAGGAGCTTGTTGAAG      |
| pNZT-F         | AGCTCCTCTCTTATGGTACCCAATTCGCCCTATAGTGAGT  |
| pNZT-R         | ATCGCCTCAAGTTTGTGCGACATTTTTAAAGTATGTATACA |
| Genome-F       | AAACTTGAGGCGATCACATCTG                    |
| Genome-R       | ATAAGAGAGGAGCTTGTTGAAG                    |
| AmyA-F         | ATGAGAGGGAGAGGAAACATGATTC                 |
| AmyA-R         | TTATTTCTGAACATAAATGGAGACG                 |
| PFA-F          | CTCGAGCATCACCACCACCATC                    |
| PFA-R          | CTGCAGTTATCCAACACCACAGTAG                 |

Underscored nucleotides indicate sites of restriction digestion.

## Design of two synthetic *pfa* genes

The optimization of GenScript (*opfa*) focused on the codon optimization, involving transcription, mRNA processing and stability, translation and protein folding ([http://www.genscript.com/codon\\_opt.html?src=gssb](http://www.genscript.com/codon_opt.html?src=gssb)). According to our BAA protein expression pattern-mimicking strategy, *mpfa* was designed to mimic BAA as many aspects as possible, which included the mRNA structure of BAA in addition to codon optimization. As shown in Figure S1, the mRNA structure of *opfa* was different with that of BAA while the mRNA structure of *mpfa* was similar with that of BAA.

**Figure S1 the mRNA structures of BAA, *opfa* and *mpfa*.** All the mRNA structure were calculated on the website (<http://rna.tbi.univie.ac.at/cgi-bin/RNAfold.cgi>).”

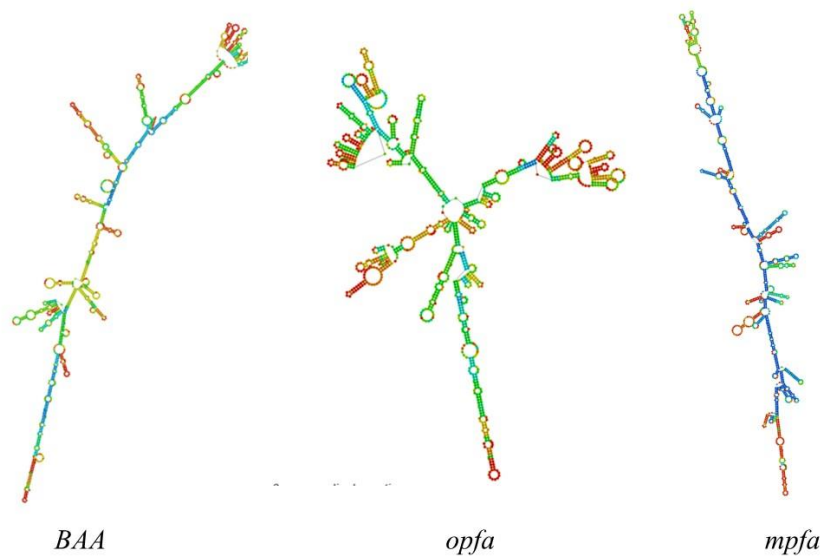

Supplement: srep22229-s1.pdf [file srep22229-s1.pdf]
